# Supplementary material for: Memory CD4 T cell subsets are kinetically heterogeneous and replenished from naive T cells at high levels
Source: eLife journal article supplement (doi:10.7554/elife.23013), 2017-03-10
Supplement: supp [file 4TcmBRDU.xls]

## Sheet: KmRatioUpExpt185
0	0
0	0
0.142857	0
0.142857	0.000888099
0.285714	0
0.285714	0
0.428571	0.0189003
0.428571	0.0200573
0.571429	0.0522565
0.571429	0.07628
1	0.154013
1	0.154122
1.57143	0.251476
1.57143	0.262295
2.28571	0.338147
2.28571	0.42116
3	0.409174
3	0.477162

## Sheet: KpRatioUpExpt185
0	0
0	0.00155521
0.142857	0.440746
0.142857	0.471562
0.285714	0.617284
0.285714	0.671979
0.428571	0.793789
0.428571	0.86533
0.571429	0.888889
0.571429	0.902778
1	0.939823
1	0.947536
1.57143	0.938343
1.57143	0.955556
2.28571	0.944149
2.28571	0.967213
3	0.939058
3	0.966728

## Sheet: KmRatioUpExpt203
0	0
0	0
0.142857	0
0.142857	0
0.285714	0
0.285714	0.00105485
0.428571	0.0153846
0.428571	0.0172414
0.571429	0.0502959
0.571429	0.0656371
1	0.212471
1	0.213379
1.57143	0.3
1.57143	0.310734
2.28571	0.342446
2.28571	0.436027
3	0.461049
3	0.528443

## Sheet: KpRatioUpExpt203
0	0
0	0
0.142857	0.435308
0.142857	0.463115
0.285714	0.6762
0.285714	0.686275
0.428571	0.805873
0.428571	0.829139
0.571429	0.858127
0.571429	0.907135
1	0.936212
1	0.944091
1.57143	0.959596
1.57143	0.959654
2.28571	0.937817
2.28571	0.938259
3	0.954373
3	0.961039

## Sheet: KmRatioDownExpt184
0.571429	0.0353846
0.571429	0.0380774
0.571429	0.0499469
1.14286	0.158029
1.14286	0.1775
1.14286	0.230405
1.71429	0.105156
1.71429	0.120463
1.71429	0.136961

## Sheet: KpRatioDownExpt184
0.571429	0.898106
0.571429	0.898305
0.571429	0.90067
1.14286	0.112626
1.14286	0.143116
1.14286	0.169579
1.71429	0.0132908
1.71429	0.0172693
1.71429	0.0188172

## Sheet: KmRatioDownExpt206
1	0.257113
1	0.264744
1.28571	0.320635
1.28571	0.387569
1.57143	0.371058
1.57143	0.375059
2	0.281846
2	0.320059
2.57143	0.137318
2.57143	0.160301
3	0.1662
3	0.186434

## Sheet: KpRatioDownExpt206
1	0.929273
1	0.948317
1.28571	0.556104
1.28571	0.647059
1.57143	0.238135
1.57143	0.417112
2	0.0942928
2	0.111755
2.57143	0.0408288
2.57143	0.054755
3	0.045203
3	0.0705183

## Sheet: KmRatioDownExpt196
1	0.149099
1	0.18013
1.57143	0.257725
1.57143	0.297459
1.85714	0.207576
1.85714	0.208341
2	0.208859
2	0.20897
2.57143	0.129456
2.57143	0.150657
3	0.103938
3	0.10692

## Sheet: KpRatioDownExpt196
1	0.863477
1	0.94625
1.57143	0.11045
1.57143	0.113768
1.85714	0.0408511
1.85714	0.0512168
2	0.0232804
2	0.035355
2.57143	0.0136842
2.57143	0.016844
3	0.0199892
3	0.0205146

[truncated: 2 more sheets: KmRatioDownExpt197, KpRatioDownExpt197]
