# Supplementary material for: Memory CD4 T cell subsets are kinetically heterogeneous and replenished from naive T cells at high levels
Source: eLife journal article supplement (doi:10.7554/elife.23013), 2017-03-10
Supplement: supp [file 4TcmMeanKi67Pos.xls]

## Sheet: Sheet1
0.484882
