# Supplementary material for: Memory CD4 T cell subsets are kinetically heterogeneous and replenished from naive T cells at high levels
Source: eLife journal article supplement (doi:10.7554/elife.23013), 2017-03-10
Supplement: supp [file 4TemAllKi67Pos.xls]

## Sheet: Sheet1
0.249367
0.34854
0.30498
0.335861
0.328719
0.275368
0.27461
0.309296
0.318344
0.319831
0.263605
0.308426
0.318702
0.274193
0.328773
0.283673
0.317314
0.35569
0.280257
0.292018
0.297945
0.291472
0.3488
0.334322
0.307624
0.308913
0.313697
0.338469
0.326092
0.249679
0.320109
0.296637
0.34609
0.35655
0.32428
0.328783
0.308926
0.294861
0.295272
0.279213
0.364505
0.312201
0.291215
0.286707
0.323709
0.253047
0.257755
0.2936
0.224006
0.269115
0.282704
0.309433
0.320123
0.226803
0.191983
0.269435
0.282795
0.306307
0.310858
0.301973
0.357872
0.340143
0.343631
0.382518
0.404516
0.38425
0.331142
0.375006
0.36108
0.298987
0.313537
0.305743
0.313793
0.349474
0.299223
0.338427
0.343356
0.357275
0.279297
0.336949
0.31088
