# Supplementary material for: Memory CD4 T cell subsets are kinetically heterogeneous and replenished from naive T cells at high levels
Source: eLife journal article supplement (doi:10.7554/elife.23013), 2017-03-10
Supplement: supp [file 4TemBRDU.xls]

## Sheet: KmRatioUpExpt185
0	0
0	0
0.142857	0.000317192
0.142857	0.000630318
0.285714	0.000417595
0.285714	0.00269578
0.428571	0.0235935
0.428571	0.0244849
0.571429	0.0574815
0.571429	0.0762515
1	0.182373
1	0.225521
1.57143	0.345607
1.57143	0.355834
2.28571	0.381808
2.28571	0.410085
3	0.487097
3	0.536897

## Sheet: KpRatioUpExpt185
0	0
0	0.00236897
0.142857	0.356237
0.142857	0.365252
0.285714	0.47619
0.285714	0.625103
0.428571	0.764343
0.428571	0.828721
0.571429	0.873702
0.571429	0.880592
1	0.9375
1	0.954557
1.57143	0.944673
1.57143	0.945413
2.28571	0.935055
2.28571	0.957687
3	0.935598
3	0.981449

## Sheet: KmRatioUpExpt203
0	0
0	0
0.142857	0
0.142857	0.000212269
0.285714	0.00197466
0.285714	0.00329394
0.428571	0.0166453
0.428571	0.0172181
0.571429	0.0520201
0.571429	0.0584061
1	0.157747
1	0.188933
1.57143	0.271163
1.57143	0.279558
2.28571	0.369003
2.28571	0.405164
3	0.460678
3	0.515943

## Sheet: KpRatioUpExpt203
0	0
0	0
0.142857	0.341073
0.142857	0.401608
0.285714	0.635031
0.285714	0.657143
0.428571	0.723187
0.428571	0.754323
0.571429	0.81899
0.571429	0.834977
1	0.913074
1	0.920991
1.57143	0.912635
1.57143	0.930336
2.28571	0.886853
2.28571	0.892473
3	0.905317
3	0.934393

## Sheet: KmRatioDownExpt184
0.571429	0.0402975
0.571429	0.046364
0.571429	0.0524723
1.14286	0.194367
1.14286	0.200732
1.14286	0.229095
1.71429	0.133886
1.71429	0.156046
1.71429	0.158366

## Sheet: KpRatioDownExpt184
0.571429	0.853875
0.571429	0.867596
0.571429	0.873174
1.14286	0.265788
1.14286	0.313135
1.14286	0.337548
1.71429	0.0352622
1.71429	0.0488426
1.71429	0.0587646

## Sheet: KmRatioDownExpt206
1	0.162678
1	0.190352
1.28571	0.265816
1.28571	0.267378
1.57143	0.287603
1.57143	0.306742
2	0.337844
2	0.346073
2.57143	0.194604
2.57143	0.205755
3	0.254856
3	0.300256

## Sheet: KpRatioDownExpt206
1	0.890746
1	0.912192
1.28571	0.617215
1.28571	0.778875
1.57143	0.420856
1.57143	0.602152
2	0.201275
2	0.253398
2.57143	0.0753357
2.57143	0.089321
3	0.0814262
3	0.0928649

## Sheet: KmRatioDownExpt196
1	0.222672
1	0.232431
1.57143	0.309593
1.57143	0.32185
1.85714	0.298831
1.85714	0.319252
2	0.253903
2	0.288225
2.57143	0.177808
2.57143	0.180965
3	0.136282
3	0.164693

## Sheet: KpRatioDownExpt196
1	0.896352
1	0.955133
1.57143	0.218722
1.57143	0.22916
1.85714	0.104105
1.85714	0.142058
2	0.0655975
2	0.0762172
2.57143	0.0271296
2.57143	0.0308446
3	0.0154185
3	0.0186916

[truncated: 2 more sheets: KmRatioDownExpt197, KpRatioDownExpt197]
