# Supplementary material for: Memory CD4 T cell subsets are kinetically heterogeneous and replenished from naive T cells at high levels
Source: eLife journal article supplement (doi:10.7554/elife.23013), 2017-03-10
Supplement: supp [file 29AprilRegate.xlsx]

## Sheet: expt184
mouse.id	expt.id	days.on.BrdU	days.off.BrdU	mouse.age	organ	population	Ki67pos.BrdUneg	Ki67pos.BrdUpos	Ki67neg.BrdUpos	Ki67neg.BrdUneg
TH184-01	ex184	4	8	14	LN	4nai	239093	21951.5	612861	1.13802e+07
TH184-02	ex184	4	8	14	LN	4nai	289036	10572.1	462926	12068100
TH184-03	ex184	4	8	14	LN	4nai	434759	23956.1	720695	1.4492e+07
TH184-04	ex184	4	4	14	LN	4nai	421883	86375.8	489702	1.65808e+07
TH184-05	ex184	4	4	14	LN	4nai	347130	43770.8	255120	1.36927e+07
TH184-06	ex184	4	4	14	LN	4nai	228561	65809.9	347133	9195000
TH184-07	ex184	4	0	14	LN	4nai	222181	183555	89275	1.33287e+07
TH184-08	ex184	4	0	14	LN	4nai	289539	210207	64846.3	1.62893e+07
TH184-09	ex184	4	0	14	LN	4nai	278202	141155	33314.9	1.02226e+07
TH184-10	ex184	0	0	14	LN	4nai	357265	0	94.2404	1.1356e+07
TH184-01	ex184	4	8	14	LN	4em	241574	12405	84030.4	446580
TH184-02	ex184	4	8	14	LN	4em	266047	9724.3	91857.2	594229
TH184-03	ex184	4	8	14	LN	4em	333493	20821.1	134568	727793
TH184-04	ex184	4	4	14	LN	4em	255117	116305	164252	654014
TH184-05	ex184	4	4	14	LN	4em	287089	103927	156177	525536
TH184-06	ex184	4	4	14	LN	4em	165160	84156.1	125096	518510
TH184-07	ex184	4	0	14	LN	4em	39768.4	260589	28887.9	687978
TH184-08	ex184	4	0	14	LN	4em	41034.1	282514	35873.8	737868
TH184-09	ex184	4	0	14	LN	4em	44313.3	258943	35596.7	642794
TH184-10	ex184	0	0	14	LN	4em	234140	94.2404	0	566102
TH184-01	ex184	4	8	14	LN	4cm	98215.2	1725.91	11110.6	94547.7
TH184-02	ex184	4	8	14	LN	4cm	92555.3	1246.7	11419.8	83379.6
TH184-03	ex184	4	8	14	LN	4cm	86360.4	1656.23	12954.1	81628.3
TH184-04	ex184	4	4	14	LN	4cm	74045	9397.78	14785	78773.8
TH184-05	ex184	4	4	14	LN	4cm	81296.9	13578.1	19536.5	65255.2
TH184-06	ex184	4	4	14	LN	4cm	35378.9	7224.64	6217.57	28811
TH184-07	ex184	4	0	14	LN	4cm	6147.51	54185.2	3318.57	83834.7
TH184-08	ex184	4	0	14	LN	4cm	6714.67	59312.9	2859.95	77964.8
TH184-09	ex184	4	0	14	LN	4cm	4061.67	36828.9	2144.93	40799.3
TH184-10	ex184	0	0	14	LN	4cm	56874.1	47.1202	0	54423.8
TH184-01	ex184	4	8	14	LN	8nai	334935	23839.2	305594	1.25129e+07
TH184-02	ex184	4	8	14	LN	8nai	283401	11469.7	200570	1.10209e+07
TH184-03	ex184	4	8	14	LN	8nai	427011	28037.5	312258	1.32498e+07
TH184-04	ex184	4	4	14	LN	8nai	585236	54770.5	313898	1.4785e+07
TH184-05	ex184	4	4	14	LN	8nai	490130	29505.2	216161	1.28333e+07
TH184-06	ex184	4	4	14	LN	8nai	319811	52105	267268	10114500
TH184-07	ex184	4	0	14	LN	8nai	269675	307267	79264.8	1.32743e+07
TH184-08	ex184	4	0	14	LN	8nai	352147	332003	59064.3	1.63515e+07
TH184-09	ex184	4	0	14	LN	8nai	310148	199615	32630.3	1.00401e+07
TH184-10	ex184	0	0	14	LN	8nai	433270	141.361	47.1202	1.1356e+07
TH184-01	ex184	4	8	14	LN	8em	29772	1186.57	7820.54	43795
TH184-02	ex184	4	8	14	LN	8em	37052.1	997.364	9524.82	52960
TH184-03	ex184	4	8	14	LN	8em	51343	1833.68	10765.5	58145.4
TH184-04	ex184	4	4	14	LN	8em	49203.7	12031.6	17299.1	54112.1
TH184-05	ex184	4	4	14	LN	8em	54599	9338.54	17015.6	47666.7
TH184-06	ex184	4	4	14	LN	8em	43741.9	11865.9	17777	54994.9
TH184-07	ex184	4	0	14	LN	8em	5168.26	53858.8	4733.04	67731.5
TH184-08	ex184	4	0	14	LN	8em	5657.73	57323.4	6528.15	64722
TH184-09	ex184	4	0	14	LN	8em	9720.64	50702.5	5156.96	57182.9
TH184-10	ex184	0	0	14	LN	8em	50183	94.2404	0	64743.1
TH184-01	ex184	4	8	14	LN	8cm	95680.3	4260.85	96381.5	850012
TH184-02	ex184	4	8	14	LN	8cm	64728.9	2692.88	68917.8	735157
TH184-03	ex184	4	8	14	LN	8cm	49272.7	3135	139478	629898
TH184-04	ex184	4	4	14	LN	8cm	91164.5	14126.6	121273	661257
TH184-05	ex184	4	4	14	LN	8cm	83302.1	8651.04	80437.5	573833
TH184-06	ex184	4	4	14	LN	8cm	72640.5	11034	75661.7	587035
TH184-07	ex184	4	0	14	LN	8cm	13002.3	98360.2	15124	783726
TH184-08	ex184	4	0	14	LN	8cm	12558.9	92575.4	14983.7	757639
TH184-09	ex184	4	0	14	LN	8cm	17250.7	61700.9	14740.7	492193
TH184-10	ex184	0	0	14	LN	8cm	70209.1	47.1202	0	616662
TH184-01	ex184	4	8	14	LN	8eff	101236	970.826	15371.4	151449
TH184-02	ex184	4	8	14	LN	8eff	90760.1	1246.7	11469.7	140479
TH184-03	ex184	4	8	14	LN	8eff	91506.5	1478.77	19105.8	145925
TH184-04	ex184	4	4	14	LN	8eff	96791.2	9697.08	22865.9	147312
TH184-05	ex184	4	4	14	LN	8eff	89604.2	7333.33	20109.4	116818
TH184-06	ex184	4	4	14	LN	8eff	64846.6	8187.93	19353.3	112617
TH184-07	ex184	4	0	14	LN	8eff	12567	98414.6	6637.14	179203
TH184-08	ex184	4	0	14	LN	8eff	12558.9	110108	7460.75	204798
TH184-09	ex184	4	0	14	LN	8eff	12732.7	59510.4	5248.23	118108
TH184-10	ex184	0	0	14	LN	8eff	89339.9	47.1202	0	163978

## Sheet: expt185
mouse.id	expt.id	days.on.BrdU	days.off.BrdU	mouse.age	organ	population	Ki67pos.BrdUneg	Ki67pos.BrdUpos	Ki67neg.BrdUpos	Ki67neg.BrdUneg
TH185-01	ex185	21	0	16	LN	4nai	52855.9	245197	1.25976e+06	7.57248e+06
TH185-02	ex185	21	0	16	LN	4nai	108757	304072	2.07524e+06	1.21802e+07
TH185-03	ex185	16	0	16	LN	4nai	169289	366386	1.91442e+06	2.03612e+07
TH185-04	ex185	16	0	16	LN	4nai	53075.7	171154	810954	8.77712e+06
TH185-05	ex185	11	0	16	LN	4nai	66225.4	229755	746130	1.18945e+07
TH185-06	ex185	11	0	16	LN	4nai	64954.7	220076	738188	1.32234e+07
TH185-07	ex185	7	0	16	LN	4nai	70182.2	201678	251699	1.21224e+07
TH185-08	ex185	7	0	16	LN	4nai	111794	299949	323572	1.51073e+07
TH185-09	ex185	4	0	16	LN	4nai	208133	173040	72146.7	1.10133e+07
TH185-10	ex185	4	0	16	LN	4nai	214265	184077	89414.9	1.5741e+07
TH185-11	ex185	3	0	16	LN	4nai	279055	167253	27680.8	1.81543e+07
TH185-12	ex185	3	0	16	LN	4nai	295892	302876	60198.3	2.64961e+07
TH185-13	ex185	2	0	16	LN	4nai	222208	52953.3	686.432	1.09829e+07
TH185-14	ex185	2	0	16	LN	4nai	298643	125625	2596.9	1.51756e+07
TH185-15	ex185	1	0	16	LN	4nai	373852	61526.7	1327.91	1.72629e+07
TH185-16	ex185	1	0	16	LN	4nai	678627	101028	892.735	3.37751e+07
TH185-17	ex185	0	0	16	LN	4nai	453710	236	0	19470000
TH185-18	ex185	0	0	16	LN	4nai	227708	0	0	1.35436e+07
TH185-01	ex185	21	0	16	LN	4em	3685.27	194966	193199	166645
TH185-02	ex185	21	0	16	LN	4em	20900.9	303639	340108	358126
TH185-03	ex185	16	0	16	LN	4em	29552.9	425491	471217	677854
TH185-04	ex185	16	0	16	LN	4em	9293.42	210341	171205	277202
TH185-05	ex185	11	0	16	LN	4em	19645.1	335425	324835	615060
TH185-06	ex185	11	0	16	LN	4em	15693.8	271807	218695	395904
TH185-07	ex185	7	0	16	LN	4em	10973.9	230517	122117	419370
TH185-08	ex185	7	0	16	LN	4em	15862.7	237941	129305	579710
TH185-09	ex185	4	0	16	LN	4em	35373.3	260867	36213.3	593787
TH185-10	ex185	4	0	16	LN	4em	43701.2	302314	56495.3	684412
TH185-11	ex185	3	0	16	LN	4em	110004	356795	25523.9	1.01691e+06
TH185-12	ex185	3	0	16	LN	4em	87137.8	421610	31706.6	1.31217e+06
TH185-13	ex185	2	0	16	LN	4em	140228	127480	294.185	704181
TH185-14	ex185	2	0	16	LN	4em	110530	184298	1623.06	600451
TH185-15	ex185	1	0	16	LN	4em	268770	154658	265.583	837029
TH185-16	ex185	1	0	16	LN	4em	400094	221398	892.735	1.41543e+06
TH185-17	ex185	0	0	16	LN	4em	397542	944	0	744816
TH185-18	ex185	0	0	16	LN	4em	287728	0	0	866108
TH185-01	ex185	21	0	16	LN	4cm	2726.09	79208.1	29532.7	32359.7
TH185-02	ex185	21	0	16	LN	4cm	4756.75	73297.2	32144.1	46414.4
TH185-03	ex185	16	0	16	LN	4cm	4886.69	82608.4	32694.3	63992.4
TH185-04	ex185	16	0	16	LN	4cm	1548.9	45692.6	21374.9	29377.5
TH185-05	ex185	11	0	16	LN	4cm	1688.25	36297.4	15961.6	44892.1
TH185-06	ex185	11	0	16	LN	4cm	2325	35383.6	15475.8	46064.1
TH185-07	ex185	7	0	16	LN	4cm	2105.47	38026	10973.9	60229.1
TH185-08	ex185	7	0	16	LN	4cm	2334.77	36463.6	9751.1	53562.4
TH185-09	ex185	4	0	16	LN	4cm	6160	49280	4106.67	74480
TH185-10	ex185	4	0	16	LN	4cm	5534.52	51392	5247.02	63539.2
TH185-11	ex185	3	0	16	LN	4cm	14918.9	57428.8	1887.33	92209.6
TH185-12	ex185	3	0	16	LN	4cm	10421.1	66960.9	2438.97	126605
TH185-13	ex185	2	0	16	LN	4cm	21279.4	34321.6	0	94139.2
TH185-14	ex185	2	0	16	LN	4cm	20044.8	41063.4	0	84155.7
TH185-15	ex185	1	0	16	LN	4cm	45237.6	40368.6	88.5276	99593.6
TH185-16	ex185	1	0	16	LN	4cm	62491.4	49249.2	0	122156
TH185-17	ex185	0	0	16	LN	4cm	75756	118	0	80712
TH185-18	ex185	0	0	16	LN	4cm	49205.1	0	0	71420.5
TH185-01	ex185	21	0	16	LN	8nai	50836.6	236413	805712	9.03649e+06
TH185-02	ex185	21	0	16	LN	8nai	112865	301693	1.20101e+06	1.35495e+07
TH185-03	ex185	16	0	16	LN	8nai	174176	452601	1.10556e+06	2.04776e+07
TH185-04	ex185	16	0	16	LN	8nai	54882.8	192735	540980	8.98364e+06
TH185-05	ex185	11	0	16	LN	8nai	99760.2	301199	496422	1.24317e+07
TH185-06	ex185	11	0	16	LN	8nai	105570	318670	489848	1.40227e+07
TH185-07	ex185	7	0	16	LN	8nai	105784	320414	267649	1.32708e+07
TH185-08	ex185	7	0	16	LN	8nai	177649	436602	329889	1.66867e+07
TH185-09	ex185	4	0	16	LN	8nai	328253	283640	63653.3	1.07333e+07
TH185-10	ex185	4	0	16	LN	8nai	237625	267526	88121.1	1.58129e+07
TH185-11	ex185	3	0	16	LN	8nai	299277	220099	21299.9	1.85138e+07
TH185-12	ex185	3	0	16	LN	8nai	396998	429813	46229.6	2.58309e+07
TH185-13	ex185	2	0	16	LN	8nai	323113	93060.5	882.555	1.38267e+07
TH185-14	ex185	2	0	16	LN	8nai	418831	181539	2434.59	1.62306e+07
TH185-15	ex185	1	0	16	LN	8nai	499827	101718	1062.33	1.93875e+07
TH185-16	ex185	1	0	16	LN	8nai	961178	177357	2231.84	3.46679e+07
TH185-17	ex185	0	0	16	LN	8nai	653720	118	472	20060000
TH185-18	ex185	0	0	16	LN	8nai	292210	97.4359	97.4359	1.32513e+07
TH185-01	ex185	21	0	16	LN	8em	858.214	29936.5	22465	20950.5
TH185-02	ex185	21	0	16	LN	8em	4540.53	47711.6	41945.9	43315.3
TH185-03	ex185	16	0	16	LN	8em	15241.8	108438	65272.2	99246.4
TH185-04	ex185	16	0	16	LN	8em	3562.48	42749.7	23181.9	30978.1
TH185-05	ex185	11	0	16	LN	8em	12048	90781.8	51721.8	78733.8
TH185-06	ex185	11	0	16	LN	8em	13368.8	90166.4	39525	65390.6
TH185-07	ex185	7	0	16	LN	8em	10144.5	75988.2	27052	72479
TH185-08	ex185	7	0	16	LN	8em	13321.9	83845.7	26231.8	89064.6
TH185-09	ex185	4	0	16	LN	8em	9520	64586.7	7746.67	85120
TH185-10	ex185	4	0	16	LN	8em	17322.3	87618	12362.8	104797
TH185-11	ex185	3	0	16	LN	8em	30466.9	88434.9	5482.25	150537
TH185-12	ex185	3	0	16	LN	8em	27050.4	107980	8203.82	241237
TH185-13	ex185	2	0	16	LN	8em	26476.7	35890.6	0	93256.7
TH185-14	ex185	2	0	16	LN	8em	25482	43335.7	81.153	85697.6
TH185-15	ex185	1	0	16	LN	8em	63828.4	44086.7	0	138811
TH185-16	ex185	1	0	16	LN	8em	108021	70079.7	0	229433
TH185-17	ex185	0	0	16	LN	8em	106318	118	0	150450
TH185-18	ex185	0	0	16	LN	8em	93441	0	0	160379
TH185-01	ex185	21	0	16	LN	8cm	11712.1	83701.1	242016	445767
TH185-02	ex185	21	0	16	LN	8cm	24432.4	82666.6	395171	674954
TH185-03	ex185	16	0	16	LN	8cm	37930	151837	470519	1.52476e+06
TH185-04	ex185	16	0	16	LN	8cm	7641.25	53333.9	198311	420785
TH185-05	ex185	11	0	16	LN	8cm	27932.9	187319	273803	807137
TH185-06	ex185	11	0	16	LN	8cm	32404.7	242454	253062	688345
TH185-07	ex185	7	0	16	LN	8cm	22203.1	228922	120713	621240
TH185-08	ex185	7	0	16	LN	8cm	37287.7	211091	102318	816826
TH185-09	ex185	4	0	16	LN	8cm	29306.7	167720	30613.3	848680
TH185-10	ex185	4	0	16	LN	8cm	38094.8	138938	27816.4	972854
TH185-11	ex185	3	0	16	LN	8cm	45116.2	88255.2	4763.26	1.21535e+06
TH185-12	ex185	3	0	16	LN	8cm	39245.3	161637	10753.7	1.70983e+06
TH185-13	ex185	2	0	16	LN	8cm	104730	50697.9	196.123	1.1182e+06
TH185-14	ex185	2	0	16	LN	8cm	88619.1	59728.6	568.071	1.04736e+06
TH185-15	ex185	1	0	16	LN	8cm	145716	50460.7	177.055	1.41981e+06
TH185-16	ex185	1	0	16	LN	8cm	192682	77072.8	297.578	1.96788e+06
TH185-17	ex185	0	0	16	LN	8cm	145376	118	0	1299888
TH185-18	ex185	0	0	16	LN	8cm	53492.3	0	97.4359	712451
TH185-01	ex185	21	0	16	LN	8eff	4493	57853.7	33874.2	66183.5
TH185-02	ex185	21	0	16	LN	8eff	12252.2	74882.8	57369.3	122234
TH185-03	ex185	16	0	16	LN	8eff	16638	115419	69228.1	240146
TH185-04	ex185	16	0	16	LN	8eff	6350.5	52559.4	42439.9	87254.9
TH185-05	ex185	11	0	16	LN	8eff	9362.11	57784.2	33995.2	141429
TH185-06	ex185	11	0	16	LN	8eff	12060.9	69822.7	35601.6	148800
TH185-07	ex185	7	0	16	LN	8eff	9251.29	71266.8	24500	165056
TH185-08	ex185	7	0	16	LN	8eff	10575.1	75742.7	24721.1	164533
TH185-09	ex185	4	0	16	LN	8eff	15493.3	86146.7	8773.33	168093
TH185-10	ex185	4	0	16	LN	8eff	18256.7	86467.9	8984.62	211031
TH185-11	ex185	3	0	16	LN	8eff	21389.7	64169.2	2696.19	236995
TH185-12	ex185	3	0	16	LN	8eff	28159	113523	8425.54	401876
TH185-13	ex185	2	0	16	LN	8eff	44716.1	55699	0	269964
TH185-14	ex185	2	0	16	LN	8eff	36275.4	64516.6	81.153	184298
TH185-15	ex185	1	0	16	LN	8eff	74805.8	54533	177.055	304004
TH185-16	ex185	1	0	16	LN	8eff	104152	70972.4	446.367	377627
TH185-17	ex185	0	0	16	LN	8eff	119770	118	0	264910
TH185-18	ex185	0	0	16	LN	8eff	65671.8	97.4359	0	238231

## Sheet: expt196
mouse.id	expt.id	days.on.BrdU	days.off.BrdU	mouse.age	organ	population	Ki67pos.BrdUneg	Ki67pos.BrdUpos	Ki67neg.BrdUpos	Ki67neg.BrdUneg
TH196-01	ex196	7	0	14	LN	4nai	92478.5	91637.4	61473.2	5.18702e+06
TH196-02	ex196	7	0	14	LN	4nai	310184	181149	147448	1.44708e+07
TH196-03	ex196	7	4	14	LN	4nai	475169	54388.3	550147	1.57823e+07
TH196-04	ex196	7	4	14	LN	4nai	583818	59582.4	680497	1.81669e+07
TH196-05	ex196	7	6	14	LN	4nai	460291	47353.9	851220	14562000
TH196-06	ex196	7	6	14	LN	4nai	446009	79788.5	1.01538e+06	13044075
TH196-07	ex196	7	7	14	LN	4nai	359878	37327.1	801253	1.0942e+07
TH196-08	ex196	7	7	14	LN	4nai	423252	22460.3	606869	1.29544e+07
TH196-09	ex196	7	11	14	LN	4nai	376832	4168	502951	8.96864e+06
TH196-10	ex196	7	11	14	LN	4nai	182742	1520.93	226526	4.11726e+06
TH196-11	ex196	7	14	14	LN	4nai	572650	10546.6	1.63019e+06	1.26857e+07
TH196-12	ex196	7	14	14	LN	4nai	391726	7040.07	1.1113e+06	1.20287e+07
TH196-13	ex196	0	0	14	LN	4nai	419848	0	208.465	1.24245e+07
TH196-14	ex196	0	0	14	LN	4nai	474668	0	145.887	1.58531e+07
TH196-01	ex196	7	0	14	LN	4em	3808.49	81076.4	43739.2	144442
TH196-02	ex196	7	0	14	LN	4em	24999.3	216196	121631	424604
TH196-03	ex196	7	4	14	LN	4em	256548	71821.7	189631	399560
TH196-04	ex196	7	4	14	LN	4em	304264	90453.4	282476	629934
TH196-05	ex196	7	6	14	LN	4em	314233	36514.5	213886	456075
TH196-06	ex196	7	6	14	LN	4em	261240	43256.1	176521	414183
TH196-07	ex196	7	7	14	LN	4em	265242	21884	121826	300849
TH196-08	ex196	7	7	14	LN	4em	342607	24051.9	150280	441601
TH196-09	ex196	7	11	14	LN	4em	272446	8670.93	100962	466853
TH196-10	ex196	7	11	14	LN	4em	106327	2965.04	31693.7	143443
TH196-11	ex196	7	14	14	LN	4em	344754	6566.74	102381	519270
TH196-12	ex196	7	14	14	LN	4em	354288	5548.13	81730	517981
TH196-13	ex196	0	0	14	LN	4em	224266	41.6929	41.6929	453160
TH196-14	ex196	0	0	14	LN	4em	275629	0	0	489257
TH196-01	ex196	7	0	14	LN	4cm	2009.39	35374.6	9065.61	41262.5
TH196-02	ex196	7	0	14	LN	4cm	11249.7	71151.9	18701.4	106728
TH196-03	ex196	7	4	14	LN	4cm	104406	13402.8	40936.9	96684.9
TH196-04	ex196	7	4	14	LN	4cm	133012	16515.4	49800.2	143430
TH196-05	ex196	7	6	14	LN	4cm	123394	5255.46	37499.9	143157
TH196-06	ex196	7	6	14	LN	4cm	150298	8113.32	50383.3	191448
TH196-07	ex196	7	7	14	LN	4cm	122814	4501.21	28471.1	107846
TH196-08	ex196	7	7	14	LN	4cm	122426	2918.07	28429	107615
TH196-09	ex196	7	11	14	LN	4cm	82541.3	1414.14	16634.8	93780
TH196-10	ex196	7	11	14	LN	4cm	43185.1	599.153	6360.24	42770.3
TH196-11	ex196	7	14	14	LN	4cm	140140	2935.13	16217.9	135464
TH196-12	ex196	7	14	14	LN	4cm	84574	1725.05	10583.4	91241.1
TH196-13	ex196	0	0	14	LN	4cm	81634.7	0	0	124036
TH196-14	ex196	0	0	14	LN	4cm	101343	0	0	120211
TH196-01	ex196	7	0	14	LN	8nai	70538.8	235425	204747	5.84124e+06
TH196-02	ex196	7	0	14	LN	8nai	187399	423498	400710	1.19228e+07
TH196-03	ex196	7	4	14	LN	8nai	347065	252080	1.0394e+06	1.27715e+07
TH196-04	ex196	7	4	14	LN	8nai	459191	275870	1.23751e+06	1.63883e+07
TH196-05	ex196	7	6	14	LN	8nai	302298	224288	1.39073e+06	1.16058e+07
TH196-06	ex196	7	6	14	LN	8nai	283473	275719	1.31109e+06	12416525
TH196-07	ex196	7	7	14	LN	8nai	189966	166728	1.06507e+06	9.1854e+06
TH196-08	ex196	7	7	14	LN	8nai	276995	173669	1.02411e+06	1.08764e+07
TH196-09	ex196	7	11	14	LN	8nai	287964	46666.7	1.11714e+06	8075500
TH196-10	ex196	7	11	14	LN	8nai	162340	27484.2	557397	3.67173e+06
TH196-11	ex196	7	14	14	LN	8nai	463950	53180.6	2.60978e+06	9.70087e+06
TH196-12	ex196	7	14	14	LN	8nai	333214	30677.9	1.73615e+06	8.95161e+06
TH196-13	ex196	0	0	14	LN	8nai	485097	41.6929	458.622	10590000
TH196-14	ex196	0	0	14	LN	8nai	550870	0	826.694	1.28867e+07
TH196-01	ex196	7	0	14	LN	8em	490.664	20794.8	10771.2	14416.2
TH196-02	ex196	7	0	14	LN	8em	1778.8	42498.9	21874.4	35864.4
TH196-03	ex196	7	4	14	LN	8em	36032.2	22726.5	21609.6	35158.1
TH196-04	ex196	7	4	14	LN	8em	45036.1	29727.7	38938.2	48974.4
TH196-05	ex196	7	6	14	LN	8em	31970.7	13686.1	23759.1	25948.8
TH196-06	ex196	7	6	14	LN	8em	33932.5	15912.9	19229.9	28912.1
TH196-07	ex196	7	7	14	LN	8em	20054.2	6806.71	12698.5	19102.7
TH196-08	ex196	7	7	14	LN	8em	45539.5	9019.48	20647.5	30816.5
TH196-09	ex196	7	11	14	LN	8em	28506.1	1414.14	11499.2	28208.4
TH196-10	ex196	7	11	14	LN	8em	18251.1	1106.13	4670.32	13903.4
TH196-11	ex196	7	14	14	LN	8em	26764.4	1591.94	14327.4	28207.1
TH196-12	ex196	7	14	14	LN	8em	40841.7	2704.13	10257	38836.9
TH196-13	ex196	0	0	14	LN	8em	41901.4	0	41.6929	49572.9
TH196-14	ex196	0	0	14	LN	8em	51060.5	97.2581	97.2581	51887.2
TH196-01	ex196	7	0	14	LN	8cm	1448.63	49416.9	51075.8	266618
TH196-02	ex196	7	0	14	LN	8cm	5913.3	106968	113074	608782
TH196-03	ex196	7	4	14	LN	8cm	79445.8	21609.6	137767	797371
TH196-04	ex196	7	4	14	LN	8cm	101887	30871	240616	843046
TH196-05	ex196	7	6	14	LN	8cm	82937.7	15930.6	206769	797899
TH196-06	ex196	7	6	14	LN	8cm	75306	19274.8	204761	709938
TH196-07	ex196	7	7	14	LN	8cm	60857.9	11344.5	180671	589696
TH196-08	ex196	7	7	14	LN	8cm	65523.8	8665.77	160936	620222
TH196-09	ex196	7	11	14	LN	8cm	108889	19202.6	174833	519735
TH196-10	ex196	7	11	14	LN	8cm	38484.1	7159.11	80209.7	200179
TH196-11	ex196	7	14	14	LN	8cm	107854	29202.1	256650	654435
TH196-12	ex196	7	14	14	LN	8cm	90262	21120.2	157725	479470
TH196-13	ex196	0	0	14	LN	8cm	95810.3	41.6929	41.6929	919829
TH196-14	ex196	0	0	14	LN	8cm	74548.3	0	243.145	743100
TH196-01	ex196	7	0	14	LN	8eff	2686.97	64417.2	28738.9	149769
TH196-02	ex196	7	0	14	LN	8eff	7836.33	101632	40816.2	222831
TH196-03	ex196	7	4	14	LN	8eff	108048	32827.2	72258.7	277720
TH196-04	ex196	7	4	14	LN	8eff	143239	44464.5	102967	347903
TH196-05	ex196	7	6	14	LN	8eff	102865	23102.1	80255.2	239233
TH196-06	ex196	7	6	14	LN	8eff	136447	30032.8	95073.8	345152
TH196-07	ex196	7	7	14	LN	8eff	82375.9	16321.5	58259.6	199554
TH196-08	ex196	7	7	14	LN	8eff	103945	14899.8	54824.3	210587
TH196-09	ex196	7	11	14	LN	8eff	83694.9	6363.64	42126.6	146513
TH196-10	ex196	7	11	14	LN	8eff	48715.8	3256.94	28298.5	90810.1
TH196-11	ex196	7	14	14	LN	8eff	105118	11690.8	77308.4	189092
TH196-12	ex196	7	14	14	LN	8eff	79445.5	7552.92	43965.4	147515
TH196-13	ex196	0	0	14	LN	8eff	132542	0	0	330041
TH196-14	ex196	0	0	14	LN	8eff	123712	48.629	0	271739

## Sheet: expt197
mouse.id	expt.id	days.on.BrdU	days.off.BrdU	mouse.age	organ	population	Ki67pos.BrdUneg	Ki67pos.BrdUpos	Ki67neg.BrdUpos	Ki67neg.BrdUneg
TH197-01	ex197	21	0	16	LN	4nai	102773	359994	1.25848e+06	1.30917e+07
TH197-02	ex197	21	0	16	LN	4nai	116274	361747	1.47109e+06	1.08063e+07
TH197-03	ex197	21	4	16	LN	4nai	181779	193649	2.62562e+06	1.11916e+07
TH197-04	ex197	21	4	16	LN	4nai	226531	64854.2	1.12746e+06	8.47917e+06
TH197-05	ex197	21	6	16	LN	4nai	247330	94916.6	2.85918e+06	1.14372e+07
TH197-06	ex197	21	6	16	LN	4nai	311248	53794.4	2.19078e+06	1.30978e+07
TH197-07	ex197	21	8	16	LN	4nai	385905	29642.3	2.28369e+06	1.17952e+07
TH197-08	ex197	21	8	16	LN	4nai	427194	17806.3	1.55548e+06	1.26215e+07
TH197-09	ex197	21	11	16	LN	4nai	391015	9341.83	1.39242e+06	11382000
TH197-10	ex197	21	11	16	LN	4nai	587830	24141.4	2.3776e+06	1.39527e+07
TH197-11	ex197	21	14	16	LN	4nai	475338	12970.5	1.90095e+06	1.13706e+07
TH197-12	ex197	21	14	16	LN	4nai	798437	17514.2	2.10869e+06	1.44323e+07
TH197-13	ex197	0	0	16	LN	4nai	578530	0	0	20512500
TH197-14	ex197	0	0	16	LN	4nai	350968	0	399.111	1.30709e+07
TH197-01	ex197	21	0	16	LN	4em	10842.5	239746	284327	264315
TH197-02	ex197	21	0	16	LN	4em	12024.7	256809	332348	297969
TH197-03	ex197	21	4	16	LN	4em	114912	206706	435004	268316
TH197-04	ex197	21	4	16	LN	4em	121764	48239.6	204111	181920
TH197-05	ex197	21	6	16	LN	4em	255411	69928.7	398811	363132
TH197-06	ex197	21	6	16	LN	4em	293764	46368.5	323761	309377
TH197-07	ex197	21	8	16	LN	4em	347370	29210	264434	455750
TH197-08	ex197	21	8	16	LN	4em	313810	26028.6	237976	426356
TH197-09	ex197	21	11	16	LN	4em	288469	11972.6	201118	574147
TH197-10	ex197	21	11	16	LN	4em	459725	27386.2	278794	597500
TH197-11	ex197	21	14	16	LN	4em	303865	12056.3	176388	523906
TH197-12	ex197	21	14	16	LN	4em	509490	18265.9	280979	757545
TH197-13	ex197	0	0	16	LN	4em	307997	0	77.4057	822590
TH197-14	ex197	0	0	16	LN	4em	252737	0	0	593179
TH197-01	ex197	21	0	16	LN	4cm	4671.5	86682.4	41005.4	40486.4
TH197-02	ex197	21	0	16	LN	4cm	5191.28	98952.1	56892.2	45291.2
TH197-03	ex197	21	4	16	LN	4cm	94167.9	88572.1	73649.9	48779.7
TH197-04	ex197	21	4	16	LN	4cm	55840.3	8784.72	26010.4	18180.6
TH197-05	ex197	21	6	16	LN	4cm	177339	25174.3	101941	108965
TH197-06	ex197	21	6	16	LN	4cm	102736	6490.42	39001	43678.8
TH197-07	ex197	21	8	16	LN	4cm	84974.5	2655.45	28530.7	50330.1
TH197-08	ex197	21	8	16	LN	4cm	87669.8	2356.71	31789.5	64678.7
TH197-09	ex197	21	11	16	LN	4cm	73499.8	1610.66	22334.5	64533.8
TH197-10	ex197	21	11	16	LN	4cm	131674	3634.19	43026.2	99485.9
TH197-11	ex197	21	14	16	LN	4cm	102679	1828.44	25598.2	90450.9
TH197-12	ex197	21	14	16	LN	4cm	158229	2555.72	34051.2	132446
TH197-13	ex197	0	0	16	LN	4cm	106742	0	0	147226
TH197-14	ex197	0	0	16	LN	4cm	57172.7	0	0	76379.9
TH197-01	ex197	21	0	16	LN	8nai	119152	282540	924324	1.38992e+07
TH197-02	ex197	21	0	16	LN	8nai	123054	270582	931834	1.1389e+07
TH197-03	ex197	21	4	16	LN	8nai	211228	51097.1	1.06253e+06	1.10786e+07
TH197-04	ex197	21	4	16	LN	8nai	85593.8	45222.2	1.14037e+06	8.67014e+06
TH197-05	ex197	21	6	16	LN	8nai	132025	47240.7	1.69072e+06	1.3302e+07
TH197-06	ex197	21	6	16	LN	8nai	163722	29703.9	1.25698e+06	1.19868e+07
TH197-07	ex197	21	8	16	LN	8nai	370961	15500.4	1.02198e+06	1.45124e+07
TH197-08	ex197	21	8	16	LN	8nai	249812	22833.9	1.21554e+06	1.11027e+07
TH197-09	ex197	21	11	16	LN	8nai	358801	12616.8	1.19779e+06	1.12209e+07
TH197-10	ex197	21	11	16	LN	8nai	369454	6943.9	966889	1.2525e+07
TH197-11	ex197	21	14	16	LN	8nai	451340	13427.6	1.34448e+06	1.12564e+07
TH197-12	ex197	21	14	16	LN	8nai	720863	12853.8	1.6092e+06	1.52591e+07
TH197-13	ex197	0	0	16	LN	8nai	693864	0	77.4057	2.01255e+07
TH197-14	ex197	0	0	16	LN	8nai	423756	0	99.7778	1.20731e+07
TH197-01	ex197	21	0	16	LN	8em	3287.36	31950.8	30451.3	21685
TH197-02	ex197	21	0	16	LN	8em	2383.75	25903.4	26327.2	18858.1
TH197-03	ex197	21	4	16	LN	8em	18087.5	4239.25	18935.3	17296.1
TH197-04	ex197	21	4	16	LN	8em	11343.8	12489.6	25093.8	12451.4
TH197-05	ex197	21	6	16	LN	8em	19766.5	3667.37	24242	24739.2
TH197-06	ex197	21	6	16	LN	8em	22219.4	2514.31	17541.7	20348.3
TH197-07	ex197	21	8	16	LN	8em	59902.1	2655.45	27789.6	53726.6
TH197-08	ex197	21	8	16	LN	8em	33727.2	1256.91	19010.8	39069.1
TH197-09	ex197	21	11	16	LN	8em	32374.3	1288.53	14495.9	41340.3
TH197-10	ex197	21	11	16	LN	8em	47958.3	1103.24	15445.3	57173.6
TH197-11	ex197	21	14	16	LN	8em	33026.3	857.083	10170.7	39311.6
TH197-12	ex197	21	14	16	LN	8em	66974.9	1879.21	22174.6	63592.3
TH197-13	ex197	0	0	16	LN	8em	70284.3	0	0	86771.7
TH197-14	ex197	0	0	16	LN	8em	41258.1	0	0	55875.6
TH197-01	ex197	21	0	16	LN	8cm	20646.9	90719.5	306589	726448
TH197-02	ex197	21	0	16	LN	8cm	17321.9	74426	263696	568021
TH197-03	ex197	21	4	16	LN	8cm	55732	11191.6	235476	584678
TH197-04	ex197	21	4	16	LN	8cm	31243.1	18944.4	336073	470403
TH197-05	ex197	21	6	16	LN	8cm	55383.6	12804.7	487699	815711
TH197-06	ex197	21	6	16	LN	8cm	43327.9	9121.67	264587	555545
TH197-07	ex197	21	8	16	LN	8cm	82813.1	10189.5	219291	617115
TH197-08	ex197	21	8	16	LN	8cm	67192.5	12988.1	230644	471500
TH197-09	ex197	21	11	16	LN	8cm	133094	18576.3	270752	1.11388e+06
TH197-10	ex197	21	11	16	LN	8cm	103509	14017.6	244464	635853
TH197-11	ex197	21	14	16	LN	8cm	102621	13256.2	137419	660754
TH197-12	ex197	21	14	16	LN	8cm	246552	39087.5	377720	1.14857e+06
TH197-13	ex197	0	0	16	LN	8cm	166190	0	0	1.32124e+06
TH197-14	ex197	0	0	16	LN	8cm	93541.7	0	0	719348
TH197-01	ex197	21	0	16	LN	8eff	13668.5	73994.3	52828.4	132359
TH197-02	ex197	21	0	16	LN	8eff	14991.1	84490.7	65950.4	135821
TH197-03	ex197	21	4	16	LN	8eff	68449.8	8704.6	52623.3	110221
TH197-04	ex197	21	4	16	LN	8eff	53816	24291.7	66229.2	112483
TH197-05	ex197	21	6	16	LN	8eff	111078	9323.83	135071	366489
TH197-06	ex197	21	6	16	LN	8eff	68529.4	3508.33	53326.7	135188
TH197-07	ex197	21	8	16	LN	8eff	97201.9	2593.7	48539.2	208360
TH197-08	ex197	21	8	16	LN	8eff	61850.7	2513.83	39697.5	127263
TH197-09	ex197	21	11	16	LN	8eff	112531	3113.94	61795.7	393323
TH197-10	ex197	21	11	16	LN	8eff	93515.5	2076.68	39456.9	194948
TH197-11	ex197	21	14	16	LN	8eff	95707.6	3028.36	43139.9	171702
TH197-12	ex197	21	14	16	LN	8eff	170031	4209.42	66899.7	288571
TH197-13	ex197	0	0	16	LN	8eff	176253	0	0	374876
TH197-14	ex197	0	0	16	LN	8eff	86158.1	0	0	171318

## Sheet: expt203
mouse.id	expt.id	days.on.BrdU	days.off.BrdU	mouse.age	organ	population	Ki67pos.BrdUneg	Ki67pos.BrdUpos	Ki67neg.BrdUpos	Ki67neg.BrdUneg
TH203-01	ex203	21	0	12	LN	4nai	56717	261160	1.68777e+06	7.69501e+06
TH203-02	ex203	21	0	12	LN	4nai	41052.7	146542	1.01308e+06	6.41448e+06
TH203-03	ex203	16	0	12	LN	4nai	82923.7	257064	1.53667e+06	1.15915e+07
TH203-04	ex203	16	0	12	LN	4nai	98654.2	232172	1.47885e+06	1.20684e+07
TH203-05	ex203	11	0	12	LN	4nai	69168.2	213924	508269	8.69779e+06
TH203-06	ex203	11	0	12	LN	4nai	69915.2	248787	757221	11039250
TH203-07	ex203	7	0	12	LN	4nai	133642	171654	125839	8.86945e+06
TH203-08	ex203	7	0	12	LN	4nai	184690	160928	88307.2	8.30785e+06
TH203-09	ex203	4	0	12	LN	4nai	182658	81785.8	15866.6	1.11909e+07
TH203-10	ex203	4	0	12	LN	4nai	140863	114426	12217.1	8.74554e+06
TH203-11	ex203	3	0	12	LN	4nai	248206	87862.3	2176.61	1.01575e+07
TH203-12	ex203	3	0	12	LN	4nai	198169	77830.2	2679.6	8038800
TH203-13	ex203	2	0	12	LN	4nai	203594	69500.8	156.651	7.46703e+06
TH203-14	ex203	2	0	12	LN	4nai	241264	74119.4	261.675	8.30818e+06
TH203-15	ex203	1	0	12	LN	4nai	441261	42567.6	89.0536	1.3358e+07
TH203-16	ex203	1	0	12	LN	4nai	295401	40115	0	1.29008e+07
TH203-17	ex203	0	0	12	LN	4nai	315631	0	66.7438	9.67785e+06
TH203-18	ex203	0	0	12	LN	4nai	140635	0	0	4.62546e+06
TH203-01	ex203	21	0	12	LN	4em	11960.1	170338	192016	180149
TH203-02	ex203	21	0	12	LN	4em	15161.5	144967	153714	179955
TH203-03	ex203	16	0	12	LN	4em	26749.6	222022	181897	267050
TH203-04	ex203	16	0	12	LN	4em	33714.8	264259	207748	355251
TH203-05	ex203	11	0	12	LN	4em	16705.3	174508	122943	330447
TH203-06	ex203	11	0	12	LN	4em	15437	206156	131574	339076
TH203-07	ex203	7	0	12	LN	4em	11270.2	131375	67621.2	361047
TH203-08	ex203	7	0	12	LN	4em	14175.6	148902	63674.1	273346
TH203-09	ex203	4	0	12	LN	4em	39015	176526	24604.7	396665
TH203-10	ex203	4	0	12	LN	4em	29040.5	146938	20028	364976
TH203-11	ex203	3	0	12	LN	4em	53181.7	138940	7400.46	422407
TH203-12	ex203	3	0	12	LN	4em	41533.8	127525	6333.6	374170
TH203-13	ex203	2	0	12	LN	4em	49397.3	85949.2	887.689	268604
TH203-14	ex203	2	0	12	LN	4em	73007.3	139931	785.025	396765
TH203-15	ex203	1	0	12	LN	4em	113721	58864.4	89.0536	419443
TH203-16	ex203	1	0	12	LN	4em	133152	89364.2	0	524320
TH203-17	ex203	0	0	12	LN	4em	150174	0	0	364087
TH203-18	ex203	0	0	12	LN	4em	90920.3	0	0	233497
TH203-01	ex203	21	0	12	LN	4cm	3363.78	82973.1	32983.7	29433
TH203-02	ex203	21	0	12	LN	4cm	2099.28	43910	16910.9	19768.3
TH203-03	ex203	16	0	12	LN	4cm	5439.08	82656.2	23093.8	29870.4
TH203-04	ex203	16	0	12	LN	4cm	4693.26	70782	22795.8	43771.8
TH203-05	ex203	11	0	12	LN	4cm	1932.84	45974	15186.6	33686.7
TH203-06	ex203	11	0	12	LN	4cm	2872	68210	16693.5	38951.5
TH203-07	ex203	7	0	12	LN	4cm	2934.25	49548.9	12337.2	45480.9
TH203-08	ex203	7	0	12	LN	4cm	3776.29	55424.4	10689.8	39622
TH203-09	ex203	4	0	12	LN	4cm	7894.98	47753.1	2606.11	49209.5
TH203-10	ex203	4	0	12	LN	4cm	5474.31	53474.7	3404.75	48467.7
TH203-11	ex203	3	0	12	LN	4cm	8633.87	35841.4	725.535	41355.5
TH203-12	ex203	3	0	12	LN	4cm	7856.1	38123.4	791.7	50668.8
TH203-13	ex203	2	0	12	LN	4cm	16552.8	34567.6	52.217	49449.5
TH203-14	ex203	2	0	12	LN	4cm	18840.6	41213.8	0	57306.8
TH203-15	ex203	1	0	12	LN	4cm	41588	32059.3	0	64029.6
TH203-16	ex203	1	0	12	LN	4cm	37007.5	31922.5	0	70813.3
TH203-17	ex203	0	0	12	LN	4cm	47054.4	0	0	53328.3
TH203-18	ex203	0	0	12	LN	4cm	23409.8	0	0	34955.8
TH203-01	ex203	21	0	12	LN	8nai	52512.3	232287	828236	7.40031e+06
TH203-02	ex203	21	0	12	LN	8nai	42393.9	122983	547563	6.70605e+06
TH203-03	ex203	16	0	12	LN	8nai	84528.7	219436	723666	1.09673e+07
TH203-04	ex203	16	0	12	LN	8nai	92332.6	194722	720942	1.13021e+07
TH203-05	ex203	11	0	12	LN	8nai	110103	223727	292550	8.55973e+06
TH203-06	ex203	11	0	12	LN	8nai	108867	304342	447045	11218750
TH203-07	ex203	7	0	12	LN	8nai	141578	160317	82092.4	7.06889e+06
TH203-08	ex203	7	0	12	LN	8nai	200202	165576	74828.7	6.62304e+06
TH203-09	ex203	4	0	12	LN	8nai	202587	92900.1	14027	9.12138e+06
TH203-10	ex203	4	0	12	LN	8nai	171973	132518	18492.5	7.41035e+06
TH203-11	ex203	3	0	12	LN	8nai	264240	101865	3627.68	8.92409e+06
TH203-12	ex203	3	0	12	LN	8nai	209557	102738	3227.7	7734300
TH203-13	ex203	2	0	12	LN	8nai	199260	74670.3	208.868	6.1616e+06
TH203-14	ex203	2	0	12	LN	8nai	277506	104735	261.675	8.3736e+06
TH203-15	ex203	1	0	12	LN	8nai	434849	48089	267.161	1.1666e+07
TH203-16	ex203	1	0	12	LN	8nai	342013	50190.8	376.667	11582500
TH203-17	ex203	0	0	12	LN	8nai	326043	133.488	0	8.87693e+06
TH203-18	ex203	0	0	12	LN	8nai	166976	0	0	4.3783e+06
TH203-01	ex203	21	0	12	LN	8em	3270.34	22985.8	16632	12520.7
TH203-02	ex203	21	0	12	LN	8em	3032.3	12070.9	9621.72	9446.78
TH203-03	ex203	16	0	12	LN	8em	4369.1	30940.4	14444.8	18813.9
TH203-04	ex203	16	0	12	LN	8em	10535.9	41664.6	15324.9	26148.1
TH203-05	ex203	11	0	12	LN	8em	6695.92	39692.3	12149.3	24505.7
TH203-06	ex203	11	0	12	LN	8em	7539	40836.2	11847	28540.5
TH203-07	ex203	7	0	12	LN	8em	1867.25	17872.3	5468.38	23207.3
TH203-08	ex203	7	0	12	LN	8em	2730.55	20682.5	4763.94	15860.4
TH203-09	ex203	4	0	12	LN	8em	6898.52	28360.6	2529.46	32576.4
TH203-10	ex203	4	0	12	LN	8em	9680.18	32645.6	4272.63	37786.1
TH203-11	ex203	3	0	12	LN	8em	14147.9	27135	1088.3	38453.4
TH203-12	ex203	3	0	12	LN	8em	10657.5	25395.3	1218	30937.2
TH203-13	ex203	2	0	12	LN	8em	4125.14	10443.4	52.217	20208
TH203-14	ex203	2	0	12	LN	8em	9158.62	21195.7	327.094	32382.3
TH203-15	ex203	1	0	12	LN	8em	18345	13803.3	0	37313.5
TH203-16	ex203	1	0	12	LN	8em	25613.3	22600	0	49625.8
TH203-17	ex203	0	0	12	LN	8em	38244.2	0	0	44518.1
TH203-18	ex203	0	0	12	LN	8em	21503.1	0	0	23092
TH203-01	ex203	21	0	12	LN	8cm	9250.38	63444.5	191829	340208
TH203-02	ex203	21	0	12	LN	8cm	7580.75	37378.9	149399	300314
TH203-03	ex203	16	0	12	LN	8cm	16495.6	65447.3	180738	363794
TH203-04	ex203	16	0	12	LN	8cm	10631.7	45879	180259	415305
TH203-05	ex203	11	0	12	LN	8cm	6972.04	59089.8	108446	358818
TH203-06	ex203	11	0	12	LN	8cm	5115.75	76556.8	154998	424966
TH203-07	ex203	7	0	12	LN	8cm	6602.07	39212.3	28142.2	339440
TH203-08	ex203	7	0	12	LN	8cm	9818.36	75409.7	47523.2	405632
TH203-09	ex203	4	0	12	LN	8cm	18932.6	52352.1	8891.43	539311
TH203-10	ex203	4	0	12	LN	8cm	19427.1	90726.7	19894.4	438479
TH203-11	ex203	3	0	12	LN	8cm	21693.5	35623.8	1596.18	382357
TH203-12	ex203	3	0	12	LN	8cm	18209.1	44274.3	2070.6	413572
TH203-13	ex203	2	0	12	LN	8cm	34828.7	44488.9	0	441651
TH203-14	ex203	2	0	12	LN	8cm	36634.5	48867.8	196.256	533163
TH203-15	ex203	1	0	12	LN	8cm	57350.5	19502.7	0	661045
TH203-16	ex203	1	0	12	LN	8cm	54993.3	26649.2	94.1667	647019
TH203-17	ex203	0	0	12	LN	8cm	54129.2	0	66.7438	455793
TH203-18	ex203	0	0	12	LN	8cm	28741.4	0	0	215808
TH203-01	ex203	21	0	12	LN	8eff	7755.37	75311.2	47373.2	103156
TH203-02	ex203	21	0	12	LN	8eff	7930.63	42160.6	32014.1	84088
TH203-03	ex203	16	0	12	LN	8eff	18278.9	86579.5	44404.3	120908
TH203-04	ex203	16	0	12	LN	8eff	18485.7	62353.3	41377.3	136009
TH203-05	ex203	11	0	12	LN	8eff	9940.33	68546.9	26714.6	115833
TH203-06	ex203	11	0	12	LN	8eff	10500.8	80864.8	29348.2	136689
TH203-07	ex203	7	0	12	LN	8eff	9269.58	54617.1	12604	108234
TH203-08	ex203	7	0	12	LN	8eff	11967.9	68089.5	12607	118750
TH203-09	ex203	4	0	12	LN	8eff	27440.8	69981.7	5135.57	201667
TH203-10	ex203	4	0	12	LN	8eff	20161.5	76373.3	7210.07	150410
TH203-11	ex203	3	0	12	LN	8eff	31633.3	64862.9	1305.96	217516
TH203-12	ex203	3	0	12	LN	8eff	22715.7	53531.1	1339.8	150728
TH203-13	ex203	2	0	12	LN	8eff	24698.6	54723.4	52.217	156755
TH203-14	ex203	2	0	12	LN	8eff	38270	68297.1	261.675	203648
TH203-15	ex203	1	0	12	LN	8eff	88786.5	56460	0	287554
TH203-16	ex203	1	0	12	LN	8eff	68459.2	43787.5	0	224682
TH203-17	ex203	0	0	12	LN	8eff	95043.2	0	0	210977
TH203-18	ex203	0	0	12	LN	8eff	43182.7	0	0	91379.3

## Sheet: expt206
mouse.id	expt.id	days.on.BrdU	days.off.BrdU	mouse.age	organ	population	Ki67pos.BrdUneg	Ki67pos.BrdUpos	Ki67neg.BrdUpos	Ki67neg.BrdUneg
TH206-01	ex206adj	0	0	12	LN	4nai	222005	380.187	1259.37	7.65126e+06
TH206-02	ex206adj	0	0	12	LN	4nai	181399	265.168	1711.54	9.30499e+06
TH206-03	ex206adj	7	0	12	LN	4nai	87799.7	73106	128781	6.01836e+06
TH206-04	ex206adj	7	0	12	LN	4nai	249390	102555	79301.7	1.22981e+07
TH206-05	ex206adj	7	2	12	LN	4nai	123168	95641	375616	6.55999e+06
TH206-06	ex206adj	7	2	12	LN	4nai	84444.4	43503.1	190135	4.25893e+06
TH206-07	ex206adj	7	4	12	LN	4nai	218687	83713	491535	8.83035e+06
TH206-08	ex206adj	7	4	12	LN	4nai	188787	25770.7	106604	6.26547e+06
TH206-09	ex206adj	7	7	12	LN	4nai	188033	36209	509786	5.66021e+06
TH206-10	ex206adj	7	7	12	LN	4nai	298569	30732	611675	8.57706e+06
TH206-11	ex206adj	7	11	12	LN	4nai	119973	3500.72	251315	4.10598e+06
TH206-12	ex206adj	7	11	12	LN	4nai	249568	4930	333487	8.46317e+06
TH206-13	ex206adj	7	14	12	LN	4nai	177468	7856	706819	5.09628e+06
TH206-14	ex206adj	7	14	12	LN	4nai	206591	24961.4	2.33532e+06	6.98687e+06
TH206-01	ex206adj	0	0	12	LN	4em	108924	95.0467	475.234	300514
TH206-02	ex206adj	0	0	12	LN	4em	89578.6	24.1062	216.956	376876
TH206-03	ex206adj	7	0	12	LN	4em	12278.3	127553	76648.6	326018
TH206-04	ex206adj	7	0	12	LN	4em	19401.4	158179	85274.1	438916
TH206-05	ex206adj	7	2	12	LN	4em	22888.4	80620.5	95314	263258
TH206-06	ex206adj	7	2	12	LN	4em	43323.6	69856.3	72809.8	199501
TH206-07	ex206adj	7	4	12	LN	4em	80142.6	121298	156778	354330
TH206-08	ex206adj	7	4	12	LN	4em	92198.4	66999.3	124349	308014
TH206-09	ex206adj	7	7	12	LN	4em	123482	41910.1	121562	229698
TH206-10	ex206adj	7	7	12	LN	4em	193027	48642.1	182212	357125
TH206-11	ex206adj	7	11	12	LN	4em	90397	8866.3	81301.7	336478
TH206-12	ex206adj	7	11	12	LN	4em	154638	12598.9	117307	452820
TH206-13	ex206adj	7	14	12	LN	4em	140304	12437.1	98724.4	288648
TH206-14	ex206adj	7	14	12	LN	4em	193139	19772	173338	403963
TH206-01	ex206adj	0	0	12	LN	4cm	35595	71.285	0	41820.6
TH206-02	ex206adj	0	0	12	LN	4cm	39003.8	0	0	61133.3
TH206-03	ex206adj	7	0	12	LN	4cm	1731.03	31762.5	9822.61	28380.9
TH206-04	ex206adj	7	0	12	LN	4cm	3816.66	50146.7	14595.2	40534.3
TH206-05	ex206adj	7	2	12	LN	4cm	15572.3	28549.2	12384.3	26240
TH206-06	ex206adj	7	2	12	LN	4cm	17623.2	22077.9	10378.1	16399.3
TH206-07	ex206adj	7	4	12	LN	4cm	45171.8	32324.8	25502.8	43227.3
TH206-08	ex206adj	7	4	12	LN	4cm	41846	13079.7	18087.5	30138.3
TH206-09	ex206adj	7	7	12	LN	4cm	34431.2	4332	8868.34	18840.1
TH206-10	ex206adj	7	7	12	LN	4cm	53061.4	5524.21	16340	41635.1
TH206-11	ex206adj	7	11	12	LN	4cm	16096.8	932.434	2780.94	17470.9
TH206-12	ex206adj	7	11	12	LN	4cm	43110.1	1835.06	7586.72	39741.3
TH206-13	ex206adj	7	14	12	LN	4cm	38084.1	1803.02	5464.24	27413.2
TH206-14	ex206adj	7	14	12	LN	4cm	63432.6	4812.53	13625.8	59460.8
TH206-01	ex206adj	0	0	12	LN	8nai	237973	498.995	3255.35	7.10474e+06
TH206-02	ex206adj	0	0	12	LN	8nai	246703	385.699	2748.11	7.88273e+06
TH206-03	ex206adj	7	0	12	LN	8nai	127332	94945.2	96656.1	5.41451e+06
TH206-04	ex206adj	7	0	12	LN	8nai	236527	129448	87571.2	8.83486e+06
TH206-05	ex206adj	7	2	12	LN	8nai	156847	80600	164163	5.00685e+06
TH206-06	ex206adj	7	2	12	LN	8nai	128812	44743.3	120490	4.0468e+06
TH206-07	ex206adj	7	4	12	LN	8nai	258152	98759.6	376294	7.93775e+06
TH206-08	ex206adj	7	4	12	LN	8nai	223910	19436.7	115179	5.39653e+06
TH206-09	ex206adj	7	7	12	LN	8nai	203624	34635.6	247700	4.65894e+06
TH206-10	ex206adj	7	7	12	LN	8nai	300808	32883.6	325318	7.15239e+06
TH206-11	ex206adj	7	11	12	LN	8nai	157009	12039.8	186323	3.95875e+06
TH206-12	ex206adj	7	11	12	LN	8nai	256552	9147.89	195392	6.95678e+06
TH206-13	ex206adj	7	14	12	LN	8nai	176916	10560.5	418226	3.9188e+06
TH206-14	ex206adj	7	14	12	LN	8nai	230248	42588	1.27665e+06	6.08814e+06
TH206-01	ex206adj	0	0	12	LN	8em	19199.4	475.234	546.519	23642.9
TH206-02	ex206adj	0	0	12	LN	8em	26926.6	168.743	192.85	49297.2
TH206-03	ex206adj	7	0	12	LN	8em	2958.86	45510.1	16404.6	37136.7
TH206-04	ex206adj	7	0	12	LN	8em	4417.43	65448.7	20885.6	47849.6
TH206-05	ex206adj	7	2	12	LN	8em	5906.04	17677.2	11689.5	24257.7
TH206-06	ex206adj	7	2	12	LN	8em	9121.63	15942.4	15909.8	20005.6
TH206-07	ex206adj	7	4	12	LN	8em	18935.8	29073.2	27351.8	38955.5
TH206-08	ex206adj	7	4	12	LN	8em	20031.2	12576.7	17561.6	26296.7
TH206-09	ex206adj	7	7	12	LN	8em	22068.7	6498	10237.4	15713.7
TH206-10	ex206adj	7	7	12	LN	8em	42710.8	9274.85	20119.7	30441.3
TH206-11	ex206adj	7	11	12	LN	8em	26451.7	5251.08	13250.4	37673.6
TH206-12	ex206adj	7	11	12	LN	8em	34510	3615.33	12242.8	41192.9
TH206-13	ex206adj	7	14	12	LN	8em	19428.4	2502.15	9364.65	23549.6
TH206-14	ex206adj	7	14	12	LN	8em	60997.4	5827.22	26845.8	68854
TH206-01	ex206adj	0	0	12	LN	8cm	24070.6	95.0467	118.808	239470
TH206-02	ex206adj	0	0	12	LN	8cm	35604.8	0	168.743	330496
TH206-03	ex206adj	7	0	12	LN	8cm	4931.43	20349.7	15921.5	193795
TH206-04	ex206adj	7	0	12	LN	8cm	6149.06	26221.9	16008.8	242676
TH206-05	ex206adj	7	2	12	LN	8cm	13099.5	9809.33	26505.6	149633
TH206-06	ex206adj	7	2	12	LN	8cm	11569.3	6527.1	23432.3	118108
TH206-07	ex206adj	7	4	12	LN	8cm	44247.4	18744.6	81290.2	354138
TH206-08	ex206adj	7	4	12	LN	8cm	40291.1	5785.27	44590	228461
TH206-09	ex206adj	7	7	12	LN	8cm	21251.3	2595.11	34594.7	162368
TH206-10	ex206adj	7	7	12	LN	8cm	49369	5407.91	57887.9	288538
TH206-11	ex206adj	7	11	12	LN	8cm	14330	2388.34	23180	126206
TH206-12	ex206adj	7	11	12	LN	8cm	31880.7	2601.94	31415.1	247787
TH206-13	ex206adj	7	14	12	LN	8cm	26162.1	4341.96	36943.4	159383
TH206-14	ex206adj	7	14	12	LN	8cm	67230.5	13538.9	115588	378682
TH206-01	ex206adj	0	0	12	LN	8eff	50184.7	760.374	237.617	86706.4
TH206-02	ex206adj	0	0	12	LN	8eff	61470.8	1181.2	48.2124	118578
TH206-03	ex206adj	7	0	12	LN	8eff	7809.78	52313.5	14492.4	56117.7
TH206-04	ex206adj	7	0	12	LN	8eff	15761.4	70007.4	20602.9	91069.8
TH206-05	ex206adj	7	2	12	LN	8eff	29223.6	27629.6	14182.7	47943.1
TH206-06	ex206adj	7	2	12	LN	8eff	27626	15779.3	10280.2	35866.4
TH206-07	ex206adj	7	4	12	LN	8eff	53938.4	32707.3	28499.4	74723.2
TH206-08	ex206adj	7	4	12	LN	8eff	50466.7	13194.1	17401.5	56892.3
TH206-09	ex206adj	7	7	12	LN	8eff	46058.2	5660.21	10605.2	50798.8
TH206-10	ex206adj	7	7	12	LN	8eff	88009.3	6890.72	20148.8	97400.5
TH206-11	ex206adj	7	11	12	LN	8eff	28856.4	2682.79	5398.3	36348.6
TH206-12	ex206adj	7	11	12	LN	8eff	64199.6	2629.33	8326.22	76442.4
TH206-13	ex206adj	7	14	12	LN	8eff	43695.6	3955.6	10744.5	54035.3
TH206-14	ex206adj	7	14	12	LN	8eff	87263.4	10001.9	31513.4	97410.3
