# Supplementary material for: Memory CD4 T cell subsets are kinetically heterogeneous and replenished from naive T cells at high levels
Source: eLife journal article supplement (doi:10.7554/elife.23013), 2017-03-10

### CD4 effector memory

% cells resistant to displacement

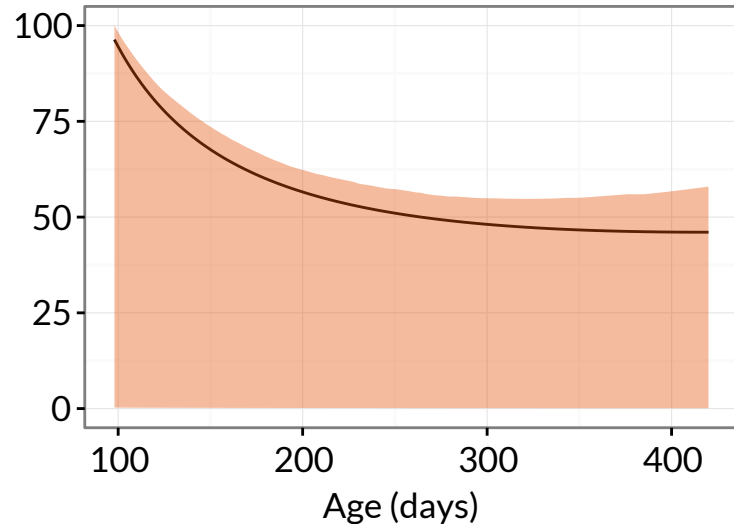

### CD4 central memory

% cells resistant to displacement

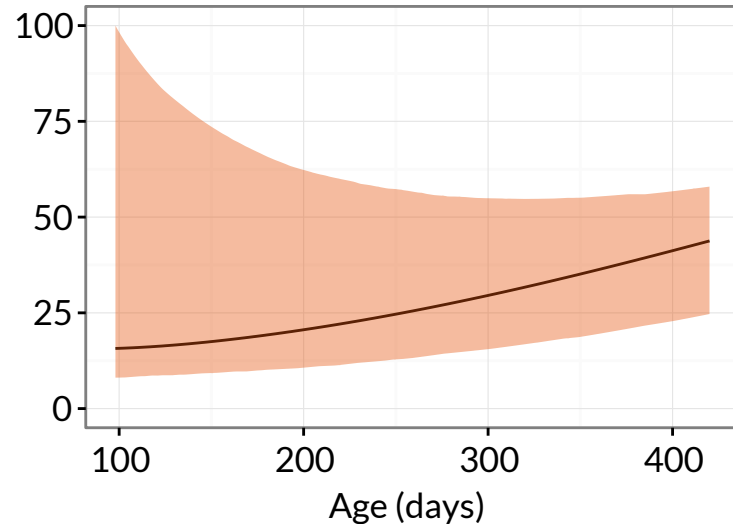

Supplement: supp [file elife_poa_e23013_Figure_2_figure_supplement_2.pdf › elife_poa_e23013_Figure_2_figure_supplement_2.pdf]
