# Supplementary material for: Memory CD4 T cell subsets are kinetically heterogeneous and replenished from naive T cells at high levels
Source: eLife journal article supplement (doi:10.7554/elife.23013), 2017-03-10
Supplement: supp [file elife_poa_e23013_Figure_5_figure_supplement_1.pdf › elife_poa_e23013_Figure_5_figure_supplement_1.pdf]

Slow subpopulation Fast subpopulation Pool-averaged

Best-fit estimates of mean lifetimes (days)

CD4 effector memory

CD4 central memory

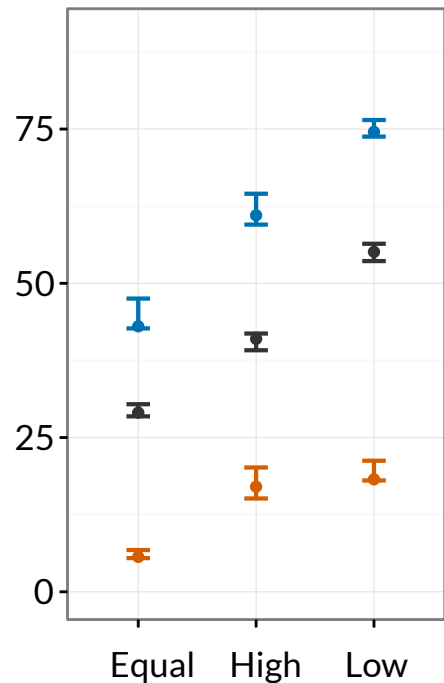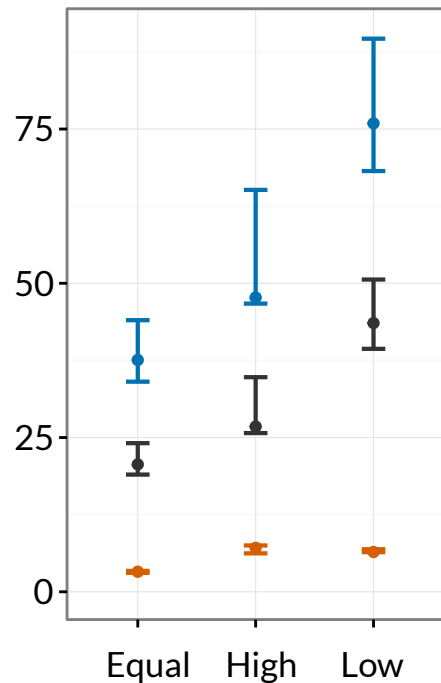

Best-fit estimates of mean interdivision times (days)

CD4 effector memory

CD4 central memory

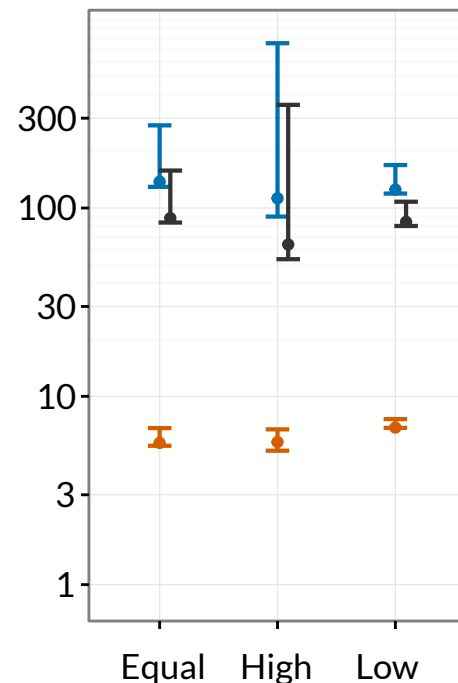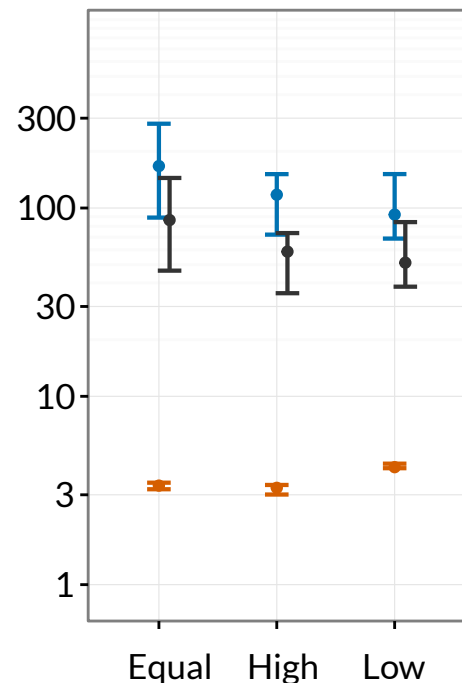

Death rate of dividing/recently-divided (Ki67hi) cells  
(Equal = death rate of quiescent (Ki67lo) cells, High = 10 x, Low = 0.1 x)
