# Supplementary material for: Memory CD4 T cell subsets are kinetically heterogeneous and replenished from naive T cells at high levels
Source: eLife journal article supplement (doi:10.7554/elife.23013), 2017-03-10
Supplement: supp [file Figure 1C - Ki67 in chimeras and controls.xlsx]

## Sheet: 1C
	BUchi											WT
Naive	2.2	1.94	2.48	2.05	2.2	1.71	2.22	1.86	2.76	2.41	2.22	2.62	2.57	2.48	3.76	3.01	1.74	2.09	2.1	2.51	2.53	2.09
Memory	22.59	21.94	21.96	21.67	23.8	23.08	23.57	26.45	28.68	24.41	26.37	29.07	28.48	29.31	23.69	21.21	23.16	27.48	24.36	22.32	28.9	30.78
