# Supplementary material for: Memory CD4 T cell subsets are kinetically heterogeneous and replenished from naive T cells at high levels
Source: eLife journal article supplement (doi:10.7554/elife.23013), 2017-03-10
Supplement: supp [file Figure 2 Supplement 1.xlsx]

## Sheet: Fig 2 Supp 1
Time (d)	Naive			Tcm			Tem
2	0.000366	0	8.78e-06	0.000319	0.000315	0	0.000966	6.2e-05	0.000197
4		0.0443	0.0858	0.0138	0.0301		0.005	0.0101
6	0.34	0.342	0.286	0.177	0.135	0.111	0.102	0.0639	0.0488
