# Supplementary material for: Memory CD4 T cell subsets are kinetically heterogeneous and replenished from naive T cells at high levels
Source: eLife journal article supplement (doi:10.7554/elife.23013), 2017-03-10
Supplement: supp [file Figure 5D.xlsx]

## Sheet: 5D
	Tem						Tcm
Donor	47.7	40.8	37.9	46.8	47	45.1	62.5	62.1	64.4	61	63.8	59.9
All	27.4	30.8	25.4	31.7	33.8	31.9	38.9	35.4	37.5	44.6	49.8	44.5
Host	25	30.1	24.7	29.3	29.4	26.2	33.8	31.2	34.2	40.5	41.6	33.5
