# Supplementary figures and images for: Memory CD4 T cell subsets are kinetically heterogeneous and replenished from naive T cells at high levels
Source: eLife journal article supplement (doi:10.7554/elife.23013), 2017-03-10

4cm brdu+%

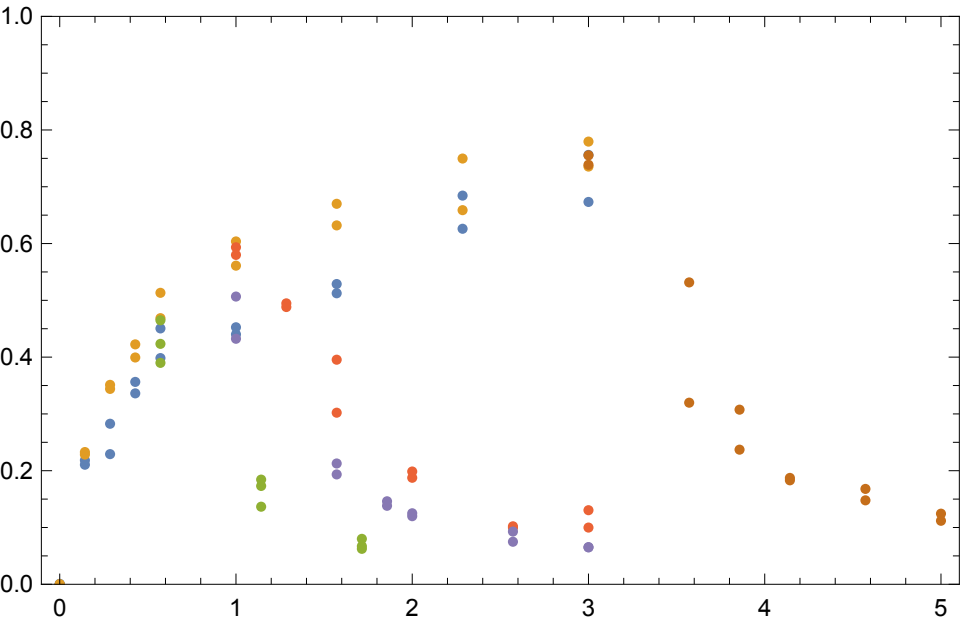

Supplement: supp [file 4Tcm Brdu+.pdf › 4Tcm Brdu+.pdf]

4cm Ki67Pos

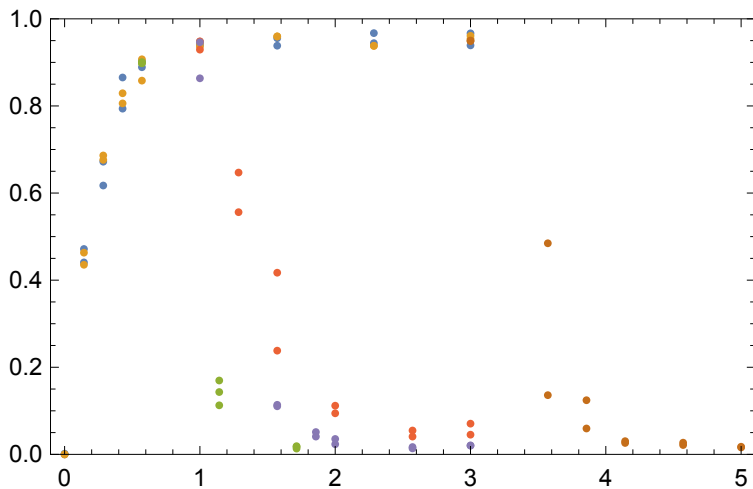

Supplement: supp [file 4TcmDataImg.pdf › 4TcmDataImg.pdf]

4em brdu+%

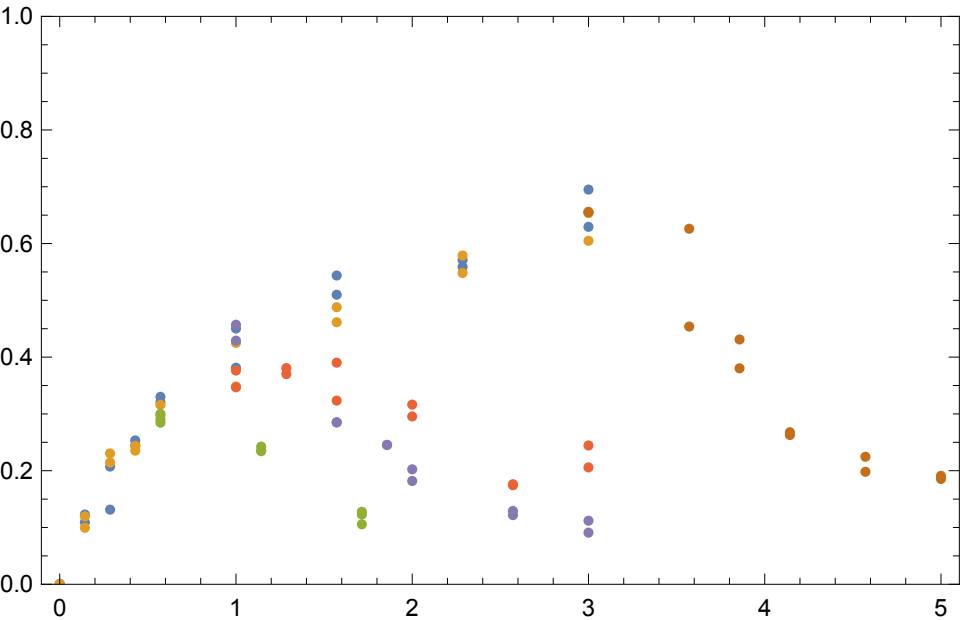

Supplement: supp [file 4Tem Brdu+.pdf › 4Tem Brdu+.pdf]

4em Ki67Pos

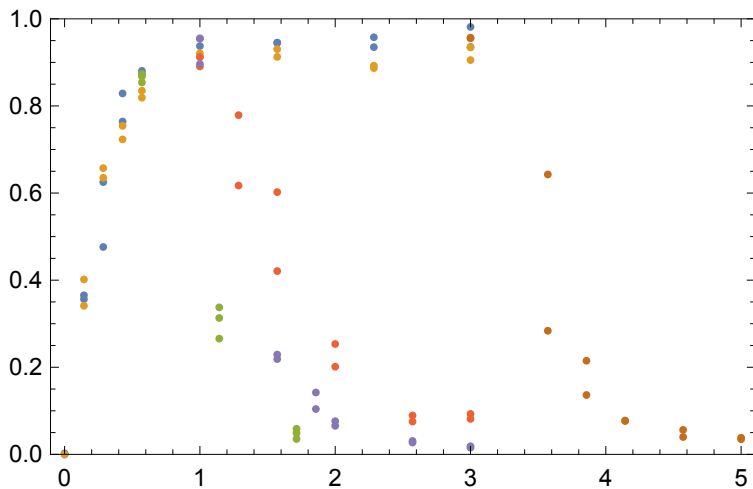

4em Ki67Neg

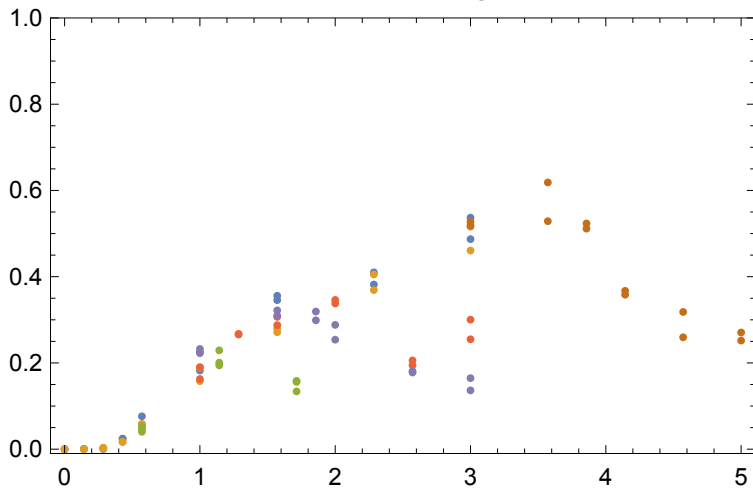

Supplement: supp [file 4TemDataImg.pdf › 4TemDataImg.pdf]

8cm brdu+%

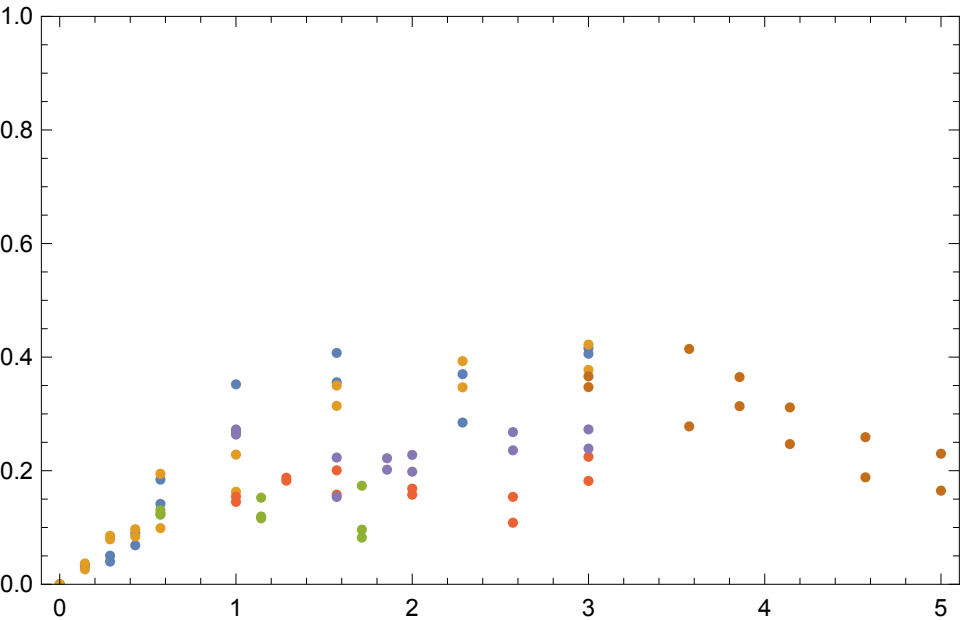

Supplement: supp [file 8Tcm Brdu+.pdf › BrdU-Ki67-analysis-code/Data/8Tcm Brdu+.pdf]

8cm Ki67Pos

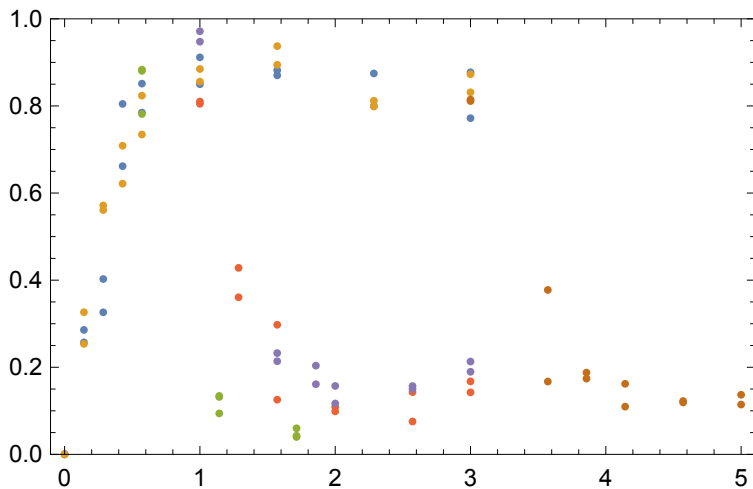

8cm Ki67Neg

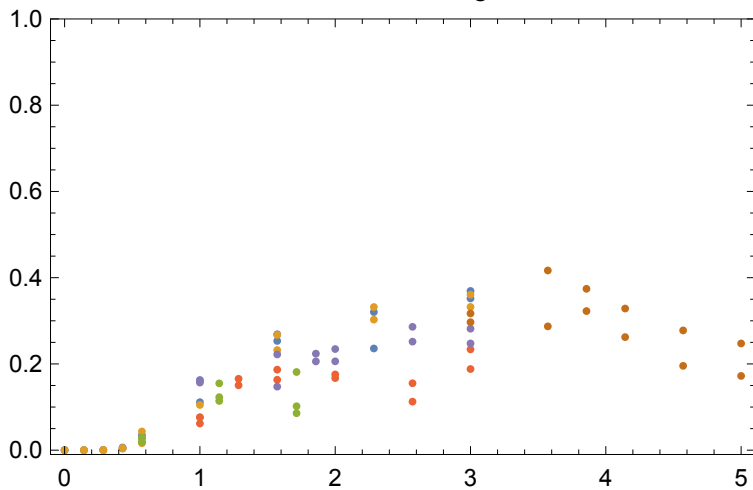

Supplement: supp [file 8TcmDataImg.pdf › BrdU-Ki67-analysis-code/Data/8TcmDataImg.pdf]

8em brdu+%

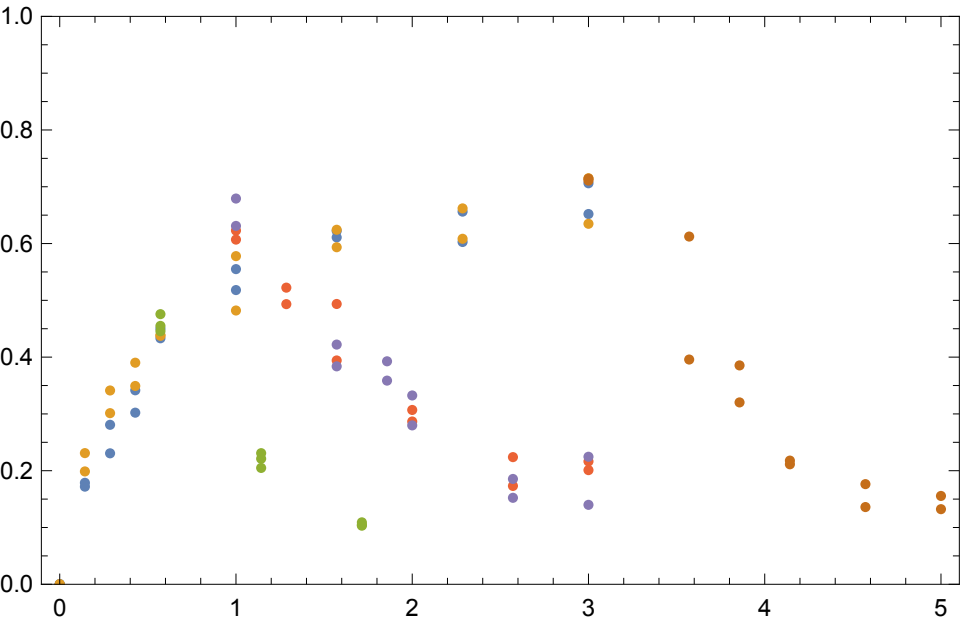

Supplement: supp [file 8Tem Brdu+.pdf › BrdU-Ki67-analysis-code/Data/8Tem Brdu+.pdf]

8em Ki67Pos

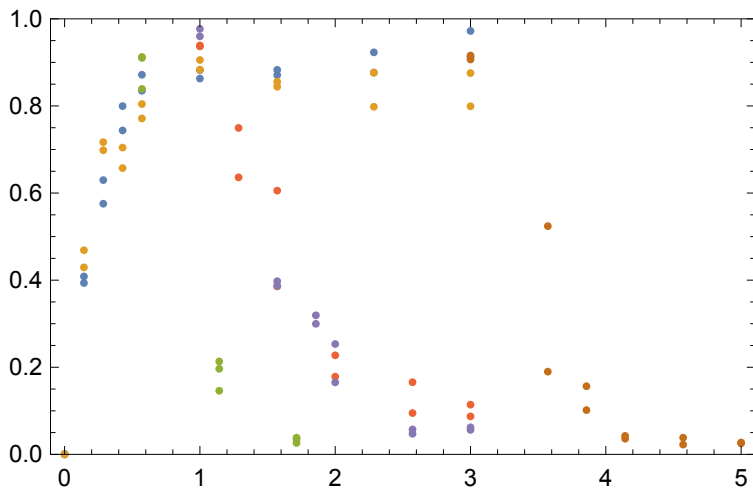

8em Ki67Neg

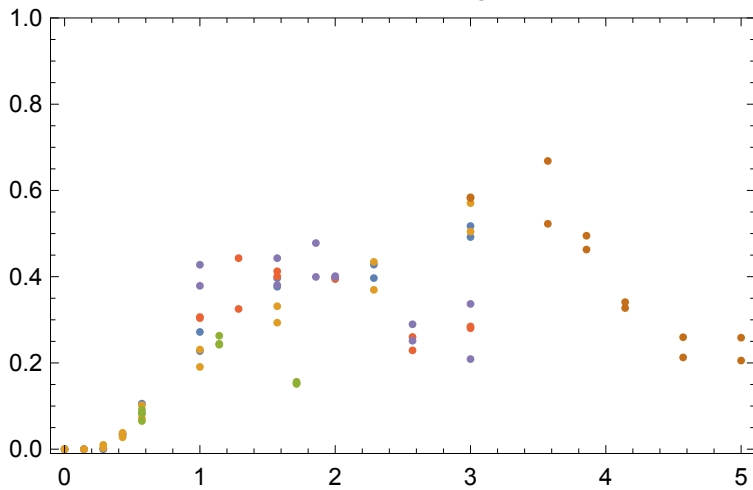

Supplement: supp [file 8TemDataImg.pdf › BrdU-Ki67-analysis-code/Data/8TemDataImg.pdf]

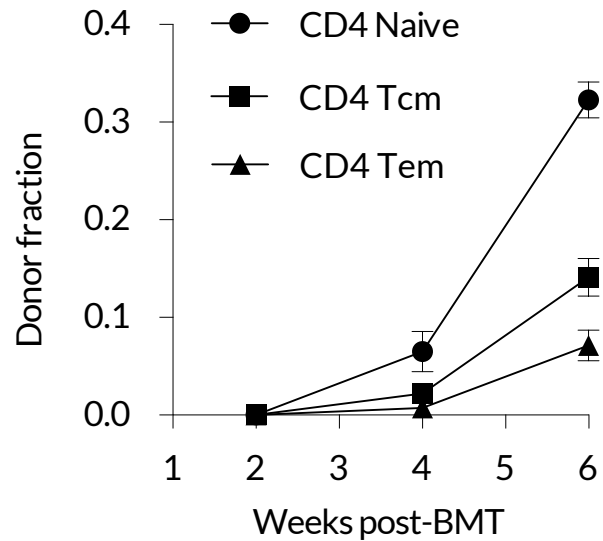

Supplement: supp [file elife_poa_e23013_Figure_2_figure_supplement_1.pdf › elife_poa_e23013_Figure_2_figure_supplement_1.pdf]
